# Supplementary material for: Inherited predisposition to breast cancer in the Carolina Breast Cancer Study
Source: PubMed Central journal article supplement (PMC7820260; doi:10.1038/s41523-020-00214-4), 2021-01-21
Supplement: 41523_2020_214_MOESM1_ESM.pdf [file 41523_2020_214_MOESM1_ESM.pdf]

## **Inherited Predisposition to Breast Cancer in the Carolina Breast Cancer Study**

### **Supplementary Tables**

Tom Walsh, PhD; Suleyman Gulsuner, MD, PhD; Ming K. Lee, PhD;

Melissa A. Troester, PhD; Andrew F. Olshan, PhD; H. Shelton Earp, MD;

Charles M. Perou, PhD; Mary-Claire King, PhD

**Table S1. Odds ratios for pathogenic variants in moderate and lower penetrance genes for breast cancer of all subtypes and for TNBC compared to controls**

| Gene                      | Breast cancer all subtypes | TNBC                | Numbers and proportions of participants |       |              |       |                   |       |
|---------------------------|----------------------------|---------------------|-----------------------------------------|-------|--------------|-------|-------------------|-------|
|                           | OR* (95% C.I.)             | OR* (95% C.I.)      | All cases (N=1370)                      |       | TNBC (N=307) |       | Controls (N=1635) |       |
| <i>ATM</i>                | 2.10 (0.88, 5.02)          | 2.01 (0.53, 7.61)   | 13                                      | 0.010 | 3            | 0.010 | 8                 | 0.005 |
| <i>CHEK2</i> <sup>^</sup> | 1.41 (0.63, 3.17)          | -                   | 13                                      | 0.010 | 0            | 0.000 | 11                | 0.007 |
| <i>BARD1</i>              | 4.79 (0.53, 42.86)         | 10.71 (0.97, 118.5) | 4                                       | 0.003 | 2            | 0.007 | 1                 | 0.001 |
| <i>BRIP1</i>              | 1.19 (0.24, 5.92)          | 1.78 (0.18, 17.15)  | 3                                       | 0.002 | 1            | 0.003 | 3                 | 0.002 |
| <i>GEN1</i>               | P = 0.029                  | -                   | 4                                       | 0.003 | 0            | 0.000 | 0                 | 0.000 |
| <i>RAD51C</i>             | 3.59 (0.37, 34.51)         | 5.34 (0.33, 85.61)  | 3                                       | 0.002 | 1            | 0.003 | 1                 | 0.001 |
| <i>RAD51D</i>             | 1.79 (0.30, 10.74)         | 2.67 (0.24, 29.52)  | 3                                       | 0.002 | 1            | 0.003 | 2                 | 0.001 |

\*\*Odds ratios adjusted for age and ancestry

<sup>^</sup>Truncating mutations only

**Table S2. Pathogenic and likely pathogenic variants in CBCS cases (N = 1370) and controls (N = 1635)**

| Gene                 | Number of different mutations | Cases with mutation | Controls with mutation |
|----------------------|-------------------------------|---------------------|------------------------|
| <i>BRCA1</i>         | 19                            | 22                  | 1                      |
| <i>BRCA2</i>         | 33                            | 36                  | 5                      |
| <i>PALB2</i>         | 11                            | 15                  | 2                      |
| <i>TP53</i>          | 4                             | 5                   | 0                      |
| <i>ATM</i>           | 16                            | 13                  | 8                      |
| <i>ATR</i>           | 2                             | 0                   | 3                      |
| <i>BARD1</i>         | 3                             | 4                   | 1                      |
| <i>BRIP1</i>         | 4                             | 3                   | 3                      |
| <i>CDH1</i>          | 1                             | 0                   | 1                      |
| <i>CHEK1</i>         | 1                             | 0                   | 1                      |
| <i>CHEK2 stops</i>   | 4                             | 13                  | 11                     |
| <i>CHEK2 p.I157T</i> | 1                             | 0                   | 3                      |
| <i>CTNNA1</i>        | 3                             | 3                   | 2                      |
| <i>FAM175A</i>       | 4                             | 0                   | 4                      |
| <i>FANCM</i>         | 6                             | 9                   | 8                      |
| <i>GEN1</i>          | 4                             | 4                   | 0                      |
| <i>MRE11A</i>        | 6                             | 1                   | 5                      |
| <i>NBN</i>           | 2                             | 1                   | 1                      |
| <i>RAD51B</i>        | 3                             | 1                   | 2                      |
| <i>RAD51C</i>        | 4                             | 3                   | 1                      |
| <i>RAD51D</i>        | 4                             | 3                   | 2                      |
| <i>RECQL</i>         | 4                             | 3                   | 2                      |
| <i>RINT1</i>         | 6                             | 2                   | 4                      |
| <i>SLX4</i>          | 3                             | 0                   | 3                      |
| <i>XRCC2</i>         | 2                             | 1                   | 1                      |

Table S3. P and LP variants in all genes sequenced on BROCA in CBCS cases and controls

| chr | start (hg19) | end (hg19)  | Gene        | cDNA                   | protein          | Number of cases | Number controls | Cases' ages at diagnosis | Controls' ages at enrollment |
|-----|--------------|-------------|-------------|------------------------|------------------|-----------------|-----------------|--------------------------|------------------------------|
| 2   | 17,954,052   |             | GEN1        | c.953(+1)G>A           | 287X             | 1               |                 | 51                       |                              |
| 2   | 17,954,567   |             | GEN1        | c.1071(+1)G>T          |                  | 1               |                 | 59                       |                              |
| 2   | 17,955,645   |             | GEN1        | c.1179delICT           | 393fs            | 1               |                 | 32                       |                              |
| 2   | 17,962,508   |             | GEN1        | c.2029 C>T             | R677X            | 1               |                 | 48                       |                              |
| 2   | 215,595,135  |             | BARD1       | c.2001G>C              | 568X             | 1               |                 | 47                       |                              |
| 2   | 215,645,382  |             | BARD1       | c.1216C>T              | R406X            | 1               | 1               | 51                       | 35                           |
| 2   | 215,645,386  |             | BARD1       | c.1212C>G              | Y404X            | 2               |                 | 24, 59                   |                              |
| 3   | 142,215,250  |             | ATR         | c.5851C>T              | R1951X           |                 | 2               | 50, 51                   |                              |
| 3   | 142,231,101  |             | ATR         | c.4852(+1)G>A          | 1559X            |                 | 1               |                          | 62                           |
| 4   | 84,383,708   |             | FAM175A     | c.1143insA             | A382fs           |                 | 1               |                          | 62                           |
| 4   | 84,383,745   |             | FAM175A     | c.1106insG             | R369fs           |                 | 1               |                          | 63                           |
| 4   | 84,383,756   |             | FAM175A     | c.1096 C>T             | Q366X            |                 | 1               |                          | 43                           |
| 4   | 84,383,841   |             | FAM175A     | c.1011delIA            | P337fs           |                 | 1               |                          | 44                           |
| 5   | 138,117,698  |             | CTNNA1      | c.85delIT              | L29fs            |                 | 1               | 48, 68                   | 73                           |
| 5   | 138,117,719  |             | CTNNA1      | c.105(+1)G>C           |                  |                 | 1               |                          | 51                           |
| 5   | 138,145,894  |             | CTNNA1      | c.468(+1)G>T           |                  |                 | 1               | 36                       |                              |
| 7   | 105,171,883  | 152,373,689 | RINT1/XRCC2 | del two complete genes |                  |                 | 1               |                          | 40                           |
| 7   | 105,182,891  |             | RINT1       | c.310C>T               | R104X            |                 | 1               |                          | 38                           |
| 7   | 105,187,693  |             | RINT1       | c.752insTGTT           | T251fs           |                 | 1               |                          | 42                           |
| 7   | 105,187,739  |             | RINT1       | c.798C>G               | Y266X            | 1               |                 | 40                       |                              |
| 7   | 105,204,391  |             | RINT1       | c.1883delIA            | E628fs           |                 | 1               |                          | 49                           |
| 7   | 105,205,851  |             | RINT1       | c.2014delI13           | 672fs            | 1               |                 | 45                       |                              |
| 7   | 152,345,090  | 152,373,689 | XRCC2       | del complete gene      |                  | 1               |                 | 46                       |                              |
| 8   | 90,955,548   |             | NBN         | c.2117C>G              | S706X            |                 | 1               |                          | 54                           |
| 8   | 90,983,442   |             | NBN         | c.657delTTTGT          | 219fs            | 1               |                 | 61                       |                              |
| 11  | 94,167,605   | 94,171,026  | MRE11A      | del exons 17+18        |                  |                 | 1               |                          | 35                           |
| 11  | 94,180,397   |             | MRE11A      | c.1771C>T              | Q591X            |                 | 1               |                          | 44                           |
| 11  | 94,180,454   |             | MRE11A      | c.1636C>T              | R546X            |                 | 1               |                          | 67                           |
| 11  | 94,180,454   |             | MRE11A      | c.1714C>T              | R572X            |                 | 1               |                          | 38                           |
| 11  | 94,200,987   |             | MRE11A      | c.1090C>T              | R364X            | 1               |                 | 42                       |                              |
| 11  | 94,204,762   |             | MRE11A      | c.822delAA             | 274fs            |                 | 1               |                          | 46                           |
| 11  | 108,098,600  |             | ATM         | c.170G>A               | W57X             | 1               | 1               | 46                       | 46                           |
| 11  | 108,106,564  |             | ATM         | c.496(+3)A>G           | del 55 aa        |                 | 1               |                          | 45                           |
| 11  | 108,121,480  |             | ATM         | c.1288delITG           | 430fs            | 1               |                 | 49                       |                              |
| 11  | 108,121,531  |             | ATM         | c.1339C>T              | R447X            | 1               | 1               | 74                       | 55                           |
| 11  | 108,121,561  |             | ATM         | c.1369C>T              | R457X            | 1               |                 | 32                       |                              |
| 11  | 108,121,594  |             | ATM         | c.1402delIAA           | 468fs            | 1               | 1               | 41                       | 70                           |
| 11  | 108,121,753  |             | ATM         | c.1561delIAG           |                  | 1               |                 | 24                       |                              |
| 11  | 108,137,979  |             | ATM         | c.2548G>T              | E850X            | 1               |                 | 46                       |                              |
| 11  | 108,139,191  |             | ATM         | c.2693T>G              | L898X            | 1               |                 | 60                       |                              |
| 11  | 108,175,528  |             | ATM         | c.5623C>T              | R1875X           | 1               |                 | 38                       |                              |
| 11  | 108,183,136  |             | ATM         | c.5919(-2)A>G          |                  |                 | 1               |                          | 50                           |
| 11  | 108,190,736  |             | ATM         | c.6403insTT            | L2135fs          | 1               |                 | 43                       |                              |
| 11  | 108,202,604  |             | ATM         | c.7630(-2)A>C          | del aa 2544-2596 |                 | 1               |                          | 39                           |
| 11  | 108,203,613  |             | ATM         | c.7913G>A              | W2638X           | 1               | 2               | 51                       | 54, 63                       |
| 11  | 108,203,621  |             | ATM         | c.7921C>T              | Q2641X           | 1               |                 | 58                       |                              |
| 11  | 108,233,681  | 108,240,500 | ATM         | del exons 62-63        |                  | 1               |                 | 59                       |                              |
| 11  | 125,497,593  |             | CHEK1       | c.157delAGAA           | 53fs             |                 | 1               |                          | 43                           |
| 12  | 21,623,219   |             | RECQL       | c.1859C>G              | S620X            | 1               |                 | 56                       | 56                           |
| 12  | 21,624,539   |             | RECQL       | c.1489dupA             | I497fs           |                 | 1               |                          | 73                           |
| 12  | 21,627,774   |             | RECQL       | c.1355(+1)G>A          |                  |                 | 1               |                          | 52                           |
| 12  | 21,627,911   |             | RECQL       | c.1219C>T              | R407X            | 2               |                 | 35, 52                   |                              |
| 13  | 32,900,691   |             | BRCA2       | c.572delAT             | 191fs            | 1               |                 | 43                       |                              |
| 13  | 32,905,149   |             | BRCA2       | c.775delIAG            | 260fs            | 1               |                 | 36                       |                              |
| 13  | 32,907,071   |             | BRCA2       | c.1456C>T              | Q486X            | 1               |                 | 59                       |                              |
| 13  | 32,907,269   |             | BRCA2       | c.1654delIT            | S552fs           | 3               |                 | 44, 44, 58               |                              |
| 13  | 32,907,383   |             | BRCA2       | c.1768delITTTA         | 590fs            | 1               |                 | 45                       |                              |
| 13  | 32,907,447   |             | BRCA2       | c.1832C>A              | S611X            | 1               |                 | 32                       |                              |
| 13  | 32,907,449   |             | BRCA2       | c.1834G>T              | E612X            | 1               |                 | 72                       |                              |
| 13  | 32,911,150   |             | BRCA2       | c.2658delITG           | 886fs            | 1               |                 | 56                       |                              |
| 13  | 32,911,298   |             | BRCA2       | c.2806delAAAC          | K936fs           | 1               |                 | 59                       |                              |
| 13  | 32,911,499   |             | BRCA2       | c.3007delICA           | 1003fs           | 2               |                 | 64, 65                   |                              |
| 13  | 32,911,899   |             | BRCA2       | c.3408ins279           | ins Alu (279 bp) | 1               |                 | 38                       |                              |
| 13  | 32,912,172   |             | BRCA2       | c.3680delITG           | 1227fs           |                 | 1               |                          | 68                           |
| 13  | 32,912,338   |             | BRCA2       | c.3846delITG           | 1282fs           | 1               | 1               | 62                       | 68                           |
| 13  | 32,912,363   |             | BRCA2       | c.3871C>T              | Q1291X           | 1               |                 | 65                       |                              |
| 13  | 32,913,425   |             | BRCA2       | c.4933delIAAAG         | 1645fs           | 1               |                 | 45                       |                              |
| 13  | 32,913,457   |             | BRCA2       | c.4965C>G              | Y1655X           | 1               |                 | 40                       |                              |
| 13  | 32,913,558   |             | BRCA2       | c.5067insA             | A1689fs          |                 | 1               |                          | 46                           |
| 13  | 32,913,795   |             | BRCA2       | c.5303delITT           | 1768fs           | 1               |                 | 51                       |                              |
| 13  | 32,914,755   |             | BRCA2       | c.6263delIC            | T2088fs          | 2               |                 | 44, 57                   |                              |
| 13  | 32,914,954   |             | BRCA2       | c.6462delITC           | 2154fs           | 1               |                 | 34                       |                              |
| 13  | 32,920,978   |             | BRCA2       | c.6952 C>T             | R2318X           | 1               |                 | 41                       |                              |
| 13  | 32,929,058   |             | BRCA2       | c.7068delITC           | 2356fs           | 1               |                 | 46                       |                              |
| 13  | 32,930,667   |             | BRCA2       | c.7539insA             | A2513fs          | 1               |                 | 39                       |                              |
| 13  | 32,930,687   |             | BRCA2       | c.7558C>T              | R2520X           | 4               |                 | 25 - 48                  |                              |

| chr | start (hg19) | end (hg19) | Gene   | cDNA                               | protein       | Number of cases | Number controls | Cases' ages at diagnosis | Controls' ages at enrollment |
|-----|--------------|------------|--------|------------------------------------|---------------|-----------------|-----------------|--------------------------|------------------------------|
| 13  | 32,932,067   |            | BRCA2  | c.7805(+1)G>A                      |               | 1               |                 | 31                       |                              |
| 13  | 32,937,458   |            | BRCA2  | c.8119A>G                          | 2702X         | 1               |                 | 46                       |                              |
| 13  | 32,944,570   |            | BRCA2  | c.8363G>A                          | W2788X        | 1               |                 | 33                       |                              |
| 13  | 32,944,571   |            | BRCA2  | c.8364G>A                          | W2788X        | 1               |                 | 49                       |                              |
| 13  | 32,954,208   |            | BRCA2  | c.9182T>G                          | L3061X        |                 | 1               |                          | 59                           |
| 13  | 32,968,863   |            | BRCA2  | c.9294C>G                          | Y3098X        | 1               |                 | 41                       |                              |
| 13  | 32,968,900   |            | BRCA2  | c.9331 G>T                         | E3111X        |                 | 1               |                          | 47                           |
| 13  | 32,972,316   |            | BRCA2  | c.9666delT                         | C3222fs       | 1               |                 | 67                       |                              |
| 13  | 32,972,590   |            | BRCA2  | c.9940delA                         | K3314fs       | 1               |                 | 49                       |                              |
| 14  | 45,624,626   |            | FANCM  | c.1360ins10                        | E454fs        | 1               | 1               | 52                       | 54                           |
| 14  | 45,645,431   |            | FANCM  | c.3474delTT                        | 1158fs        |                 | 1               |                          | 70                           |
| 14  | 45,645,480   |            | FANCM  | c.3523C>T                          | Q1175X        | 1               |                 | 58                       |                              |
| 14  | 45,658,326   |            | FANCM  | c.5101C>T                          | Q1701X        | 3               |                 | 49, 51, 60               |                              |
| 14  | 45,667,877   |            | FANCM  | c.5747delAG                        | 1916fs        |                 | 1               |                          | 44                           |
| 14  | 45,667,921   |            | FANCM  | c.5791C>T                          | R1931X        | 4               | 5               | 32 - 66                  | 32 - 71                      |
| 14  | 68,290,282   |            | RAD51B | c.22C>T                            | R8X           |                 | 1               |                          | 52                           |
| 14  | 68,292,293   |            | RAD51B | c.197C>T                           | del aa 67-105 | 1               |                 | 68                       |                              |
| 14  | 68,301,915   |            | RAD51B | c.315(+2) T>A                      | del aa 67-105 |                 | 1               |                          | 43                           |
| 16  | 3,633,462    |            | SLX4   | c.4789 G>T                         | E1597X        |                 | 1               |                          | 47                           |
| 16  | 3,641,170    |            | SLX4   | c.2469G>A                          | W823X         |                 | 1               |                          | 69                           |
| 16  | 3,644,477    |            | SLX4   | c.2137C>T                          | R713X         |                 | 1               |                          | 56                           |
| 16  | 23,614,792   |            | PALB2  | c.3549C>G                          | Y1183X        | 1               |                 | 39                       |                              |
| 16  | 23,619,212   |            | PALB2  | c.3323delA                         | Y1108fs       | 2               |                 | 39, 56                   |                              |
| 16  | 23,632,683   |            | PALB2  | c.3113G>A                          | W1038X        | 3               | 1               | 49, 49, 53               | 44                           |
| 16  | 23,641,063   |            | PALB2  | c.2411delAG                        | 804fs         | 2               |                 | 63, 67                   |                              |
| 16  | 23,641,089   |            | PALB2  | c.2386G>T                          | G796X         | 1               |                 | 63                       |                              |
| 16  | 23,646,388   |            | PALB2  | c.1479delC                         | 493fs         |                 | 1               |                          | 57                           |
| 16  | 23,646,826   |            | PALB2  | c.1037del5                         | 346fs         | 1               |                 | 63                       |                              |
| 16  | 23,647,379   |            | PALB2  | c.487delAC                         | 163fs         | 1               |                 | 37                       |                              |
| 16  | 23,647,416   |            | PALB2  | c.451 C>T                          | Q151X         | 2               |                 | 35, 37                   |                              |
| 16  | 23,649,207   |            | PALB2  | c.172del4                          | 58fs          | 1               |                 | 46                       |                              |
| 16  | 23,649,420   |            | PALB2  | c.79G>T                            | E27X          | 1               |                 | 48                       |                              |
| 16  | 68,857,427   |            | CDH1   | c.2062delITG                       | 688fs         |                 | 1               |                          | 31                           |
| 17  | 7,573,979    |            | TP53   | c.1048C>G                          | L350V         | 2               |                 | 26, 31                   |                              |
| 17  | 7,577,022    |            | TP53   | c.916C>T                           | R306X         | 1               |                 | 30                       |                              |
| 17  | 7,577,556    |            | TP53   | c.725G>T                           | C242F         | 1               |                 | 23                       |                              |
| 17  | 7,579,555    |            | TP53   | c.125delATTGATG                    | D42fs         | 1               |                 | 26                       |                              |
| 17  | 33,426,507   | 33,429,871 | RAD51D | del exons 9-10                     |               |                 | 1               |                          | 43                           |
| 17  | 33,434,036   |            | RAD51D | c.451C>T                           | Q151X         |                 | 1               |                          | 48                           |
| 17  | 33,434,403   |            | RAD51D | c.326insC                          | P109fs        | 2               |                 | 64                       |                              |
| 17  | 33,445,519   |            | RAD51D | c.261(+1)G>A                       | 50X           | 1               |                 | 48                       |                              |
| 17  | 41,197,797   |            | BRCA1  | c.5490delA                         | A1830fs       | 1               |                 | 34                       |                              |
| 17  | 41,201,157   |            | BRCA1  | c.5387C>A                          | S1796X        | 1               |                 | 32                       |                              |
| 17  | 41,209,079   |            | BRCA1  | c.5266dupC                         | Q1756fs       | 1               |                 | 41                       |                              |
| 17  | 41,215,363   |            | BRCA1  | c.5177delGAAA                      | 1726fs        | 1               | 1               | 69                       | 53                           |
| 17  | 41,215,391   |            | BRCA1  | c.5153(-1)G>C                      |               | 1               |                 | 69                       |                              |
| 17  | 41,219,136   | 41,223,743 | BRCA1  | del exons 16-17                    |               | 1               |                 | 36                       |                              |
| 17  | 41,223,186   |            | BRCA1  | c.4745delA                         | D1582fs       | 1               |                 | 41                       |                              |
| 17  | 41,230,485   | 41,235,875 | BRCA1  | dup exon 13                        |               | 1               |                 | 53                       |                              |
| 17  | 41,234,420   |            | BRCA1  | c.4357(+1)G>A                      |               | 1               |                 | 31                       |                              |
| 17  | 41,234,451   |            | BRCA1  | c.4327C>T                          | R1443X        | 2               |                 | 33, 38                   |                              |
| 17  | 41,234,567   |            | BRCA1  | c.4211delT                         | 1404fs        | 1               |                 | 32                       |                              |
| 17  | 41,243,680   |            | BRCA1  | c.3868A>T                          | K1290X        | 1               |                 | 32                       |                              |
| 17  | 41,243,800   |            | BRCA1  | c.3748G>T                          | E1250X        | 3               |                 | 32, 35, 46               |                              |
| 17  | 41,244,057   |            | BRCA1  | c.3481del11                        | 1161fs        | 1               |                 | 39                       |                              |
| 17  | 41,244,291   |            | BRCA1  | c.3257T>G                          | L1086X        | 1               |                 | 32                       |                              |
| 17  | 41,245,091   |            | BRCA1  | c.2457delC                         | S819fs        | 1               |                 | 26                       |                              |
| 17  | 41,245,210   |            | BRCA1  | c.2338C>T                          | Q780X         | 1               |                 | 53                       |                              |
| 17  | 41,246,162   |            | BRCA1  | c.1386delG                         | 462fs         | 1               |                 | 32                       |                              |
| 17  | 41,256,277   |            | BRCA1  | c.303T>G                           | Y101X         | 1               |                 | 40                       |                              |
| 17  | 56,772,331   |            | RAD51C | c.185delAA                         | Q62fs         | 1               |                 | 48                       |                              |
| 17  | 56,779,227   | 56,781,041 | RAD51C | del exon 4                         |               | 1               |                 | 48                       |                              |
| 17  | 56,780,555   |            | RAD51C | c.572(-2)A>G                       |               | 1               |                 | 44                       |                              |
| 17  | 56,807,221   | 56,810,396 | RAD51C | del exon 2                         |               |                 | 1               |                          | 47                           |
| 17  | 59,760,757   |            | BRIP1  | c.3650G>A                          | W1217X        |                 | 1               |                          | 53                           |
| 17  | 59,793,412   |            | BRIP1  | c.2392C>T                          | R798X         | 2               | 1               | 39                       | 45                           |
| 17  | 59,858,254   |            | BRIP1  | c.1741C>T                          | R581X         | 1               |                 | 46                       |                              |
| 17  | 59,930,000   | 59,941,000 | BRIP1  | del exons 1-4 (approx breakpoints) |               |                 | 1               |                          | 41                           |
| 22  | 29,091,723   | 29,127,928 | CHEK2  | dup exons 3-15                     |               | 1               |                 | 44                       |                              |
| 22  | 29,091,857   |            | CHEK2  | c.1229delC (1100delC)              | T367fs        | 11              | 9               | 30 - 73                  | 41 - 62                      |
| 22  | 29,121,087   |            | CHEK2  | c.470T>C                           | I157T         |                 | 3               |                          | 46, 53, 63                   |
| 22  | 29,130,427   |            | CHEK2  | c.283C>T                           | R95X          |                 | 2               |                          | 47, 65                       |
| 22  | 29,130,431   |            | CHEK2  | c.279G>A                           | W93X          | 1               |                 | 47                       |                              |

**Table S4. Tumor subtypes and patient genotypes**

| Gene               | Basal-like |      | Luminal A |      | Luminal B |      | HER2+ ER- |      | Negative all |      | Total tumors |      |
|--------------------|------------|------|-----------|------|-----------|------|-----------|------|--------------|------|--------------|------|
|                    | N          | prop | N         | prop | N         | prop | N         | prop | N            | prop | N            | prop |
| Total              | 156        | 0.18 | 475       | 0.55 | 84        | 0.10 | 51        | 0.06 | 105          | 0.12 | 871          | 1.00 |
| <i>BRCA1</i>       | 6          | 0.38 | 5         | 0.31 | 2         | 0.13 | 0         | 0.00 | 3            | 0.19 | 16           | 1.00 |
| <i>BRCA2</i>       | 5          | 0.19 | 12        | 0.46 | 4         | 0.15 | 0         | 0.00 | 5            | 0.20 | 26           | 1.00 |
| <i>PALB2</i>       | 3          | 0.33 | 5         | 0.56 | 1         | 0.11 | 0         | 0.00 | 0            | 0.00 | 9            | 1.00 |
| <i>CHEK2</i> stops | 0          | 0.00 | 9         | 0.82 | 2         | 0.18 | 0         | 0.00 | 0            | 0.00 | 11           | 1.00 |
| <i>ATM</i>         | 2          | 0.29 | 2         | 0.29 | 2         | 0.29 | 0         | 0.00 | 1            | 0.14 | 7            | 1.00 |
| <i>FANCM</i>       | 0          | 0.00 | 3         | 0.60 | 2         | 0.40 | 0         | 0.00 | 0            | 0.00 | 5            | 1.00 |
| Other gene         | 5          | 0.18 | 18        | 0.64 | 0         | 0.00 | 2         | 0.07 | 3            | 0.11 | 28           | 1.00 |
| No mutation        | 136        | 0.18 | 425       | 0.55 | 71        | 0.09 | 49        | 0.06 | 94           | 0.12 | 775          | 1.00 |
